# Supplementary material for: Maintenance of Transcription-Translation Coupling by Elongation Factor P
Source: PubMed Central journal article supplement (PMC5021804; doi:10.1128/mbio.01373-16), 2016-09-13
Supplement: mbo004162983sf3.pdf [file mbo004162983sf3.pdf]

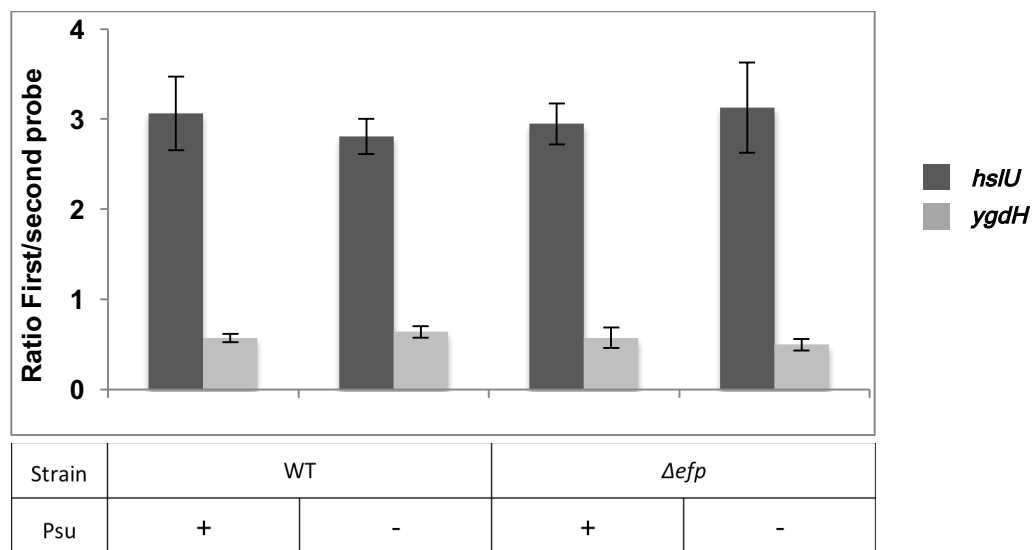

**Figure S3.** Quantification for dot blot of Wt and  $\Delta efp$  with and without Psu probed with *hslU*1 and *hslU*2 probe (dark grey bars) and similar analysis for the samples probed with *ydgH*1 and *ydgH*2 (light grey bars). The mean for at least three biological replicates is shown and error bars indicate one standard deviation.
